# Supplementary material for: Effects of Fetal Exposure to Asian Sand Dust on Fetal Development and Reproductive Function in Male Offspring
Source: Preprints.org preprint supplement (doi:10.20944/preprints201609.0070.v1), 2016-09-20
Supplement: Supplementary file 1 [file supplementary]

平成25年6月17日

吉田 成一 殿

研究倫理安全委員会委員長

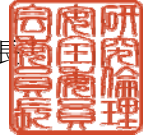

## 研究計画の審査結果について（通知）

受付番号 764 （申請日：2013.5.24）

研究課題 黄砂およびPM2.5による生殖器系への影響とそのメカニズム解明（新規）

上記研究課題については、下記の点を考慮すれば、実施して差し支えありません。  
なお、計画書等は修正済みですので再提出は不要です。

### 主な意見

- 1) 研究が長期にわたるが、卒論生はその一部期間のみ参画することになるので、研究方法に卒論生が担当する期間を記載すること。
- 2) 使用匹数の根拠の欄にそれぞれの群の内訳が記載してあるすが、数字の後に「群」が抜けている。
- 3) 倫理安全の配慮として、呼吸器に粒子がはまらないように研究者自身もマウス等の予防策をとることを記載すること。
